# Supplementary material for: Design, Implementation and Usability analysis of Patient Empowerment in ADLIFE project via Patient Reported Outcome Measures and Shared Decision Making
Source: Research Square preprint supplement (doi:10.21203/rs.3.rs-3125971/v1), 2023-07-10

## Additional File 5

- a. File format: pdf
- b. Title: The COPD Symptom Reporting Questionnaire
- c. Description of Data: The COPD Symptom Reporting Questionnaire Flow

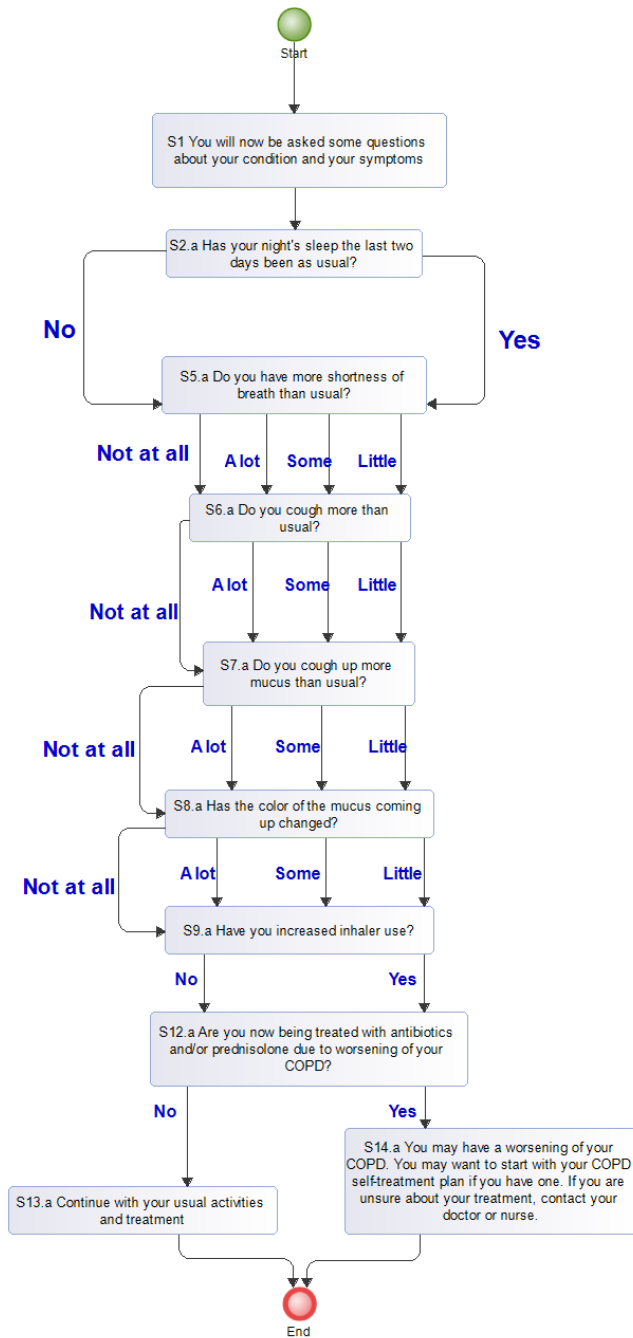

Supplement: Supplementary file [file 7fc80255edd84ce526b75467.pdf]
