# Supplementary material for: Design, Implementation and Usability analysis of Patient Empowerment in ADLIFE project via Patient Reported Outcome Measures and Shared Decision Making
Source: Research Square preprint supplement (doi:10.21203/rs.3.rs-3125971/v1), 2023-07-10
Supplement: Supplementary file [file 38940c00b0379827bb76e6a1.pdf]

## Additional File 9

- a. File format: .pdf
- b. Title: QUIS7 Questionnaire for Patients and Informal Caregivers
- c. Description of Data: QUIS7 usability questionnaire for patients and their informal caregivers

### ADLIFE Usability Testing

Dear participant,

Your feedback is very valuable to us and we appreciate your participation in the demonstration workshop and for working through the usage scenario. In the following 20 minutes we kindly ask you fill in the “QUIS” questionnaire. The QUIS (Questionnaire for User Interaction Satisfaction) is a tool to assess your personal satisfaction with how the ADLIFE software is presented to you.

The questionnaire asks for your feedback on your overall satisfaction with the ADLIFE software. It does that along several topics, including: your overall reaction to the software; the screen; the terminology used; learning factors, the capabilities of the software and how you experienced them, the user manuals that you used. You can save your progress anytime during the survey and resume it later by following the original link to the questionnaire.

Thank you very much in advance.

**Please answer all questions by ticking the most appropriate box for each of the following statements:**

#### 1. Personal Information

Do you have a chronic condition or do you care for someone who does?

☐ I have a chronic condition    ☐ I am a carer of a person who has a chronic condition

*If you are a carer of a person with a chronic condition, please answer the questions on behalf of the person you are caring for.*

#### 2. Overall Reaction to the ADLIFE System

|                              |               |   |   |   |   |   |   |   |               |    |
|------------------------------|---------------|---|---|---|---|---|---|---|---------------|----|
| 2.1 I find the ADLIFE system | Terrible 1    | 2 | 3 | 4 | 5 | 6 | 7 | 8 | 9 Wonderful   | NA |
| 2.2 I find the ADLIFE system | Frustrating 1 | 2 | 3 | 4 | 5 | 6 | 7 | 8 | 9 Satisfying  | NA |
| 2.3 I find the ADLIFE system | Dull 1        | 2 | 3 | 4 | 5 | 6 | 7 | 8 | 9 Stimulating | NA |
| 2.4 I find the ADLIFE system | Difficult 1   | 2 | 3 | 4 | 5 | 6 | 7 | 8 | 9 Easy        | NA |

|                                                                                                                             |                       |   |   |   |   |   |   |   |                  |    |
|-----------------------------------------------------------------------------------------------------------------------------|-----------------------|---|---|---|---|---|---|---|------------------|----|
| 2.5 I find the ADLIFE system<br>(Clarification: the system allows all the functions required by the user to be carried out) | Inadequate Power<br>1 | 2 | 3 | 4 | 5 | 6 | 7 | 8 | 9 Adequate Power | NA |
| 2.6 I find the ADLIFE system                                                                                                | Rigid 1               | 2 | 3 | 4 | 5 | 6 | 7 | 8 | 9 Flexible       | NA |
|                                                                                                                             |                       |   |   |   |   |   |   |   |                  |    |
| <b>3. The Screen</b>                                                                                                        |                       |   |   |   |   |   |   |   |                  |    |
| 3.1 The characters on the computer screen are                                                                               | Hard to read 1        | 2 | 3 | 4 | 5 | 6 | 7 | 8 | 9 Easy to read   | NA |
| 3.1.1 The image of characters is                                                                                            | Fuzzy 1               | 2 | 3 | 4 | 5 | 6 | 7 | 8 | 9 Sharp          | NA |
| 3.2 The highlighting on the screen is                                                                                       | Unhelpful 1           | 2 | 3 | 4 | 5 | 6 | 7 | 8 | 9 Helpful        | NA |
| 3.2.1 The use of bolding is                                                                                                 | Unhelpful 1           | 2 | 3 | 4 | 5 | 6 | 7 | 8 | 9 Helpful        | NA |
| 3.3 The screen layouts were helpful                                                                                         | Never 1               | 2 | 3 | 4 | 5 | 6 | 7 | 8 | 9 Always         | NA |
| 3.3.1 The amount of information that can be displayed on screen is                                                          | Inadequate 1          | 2 | 3 | 4 | 5 | 6 | 7 | 8 | 9 Adequate       | NA |
| 3.3.2 The arrangement of information on screen is                                                                           | Illogical 1           | 2 | 3 | 4 | 5 | 6 | 7 | 8 | 9 Logical        | NA |
| 3.4 The sequence of screens is                                                                                              | Confusing 1           | 2 | 3 | 4 | 5 | 6 | 7 | 8 | 9 Clear          | NA |
| 3.4.1 The next screen in a sequence is                                                                                      | Unpredictable 1       | 2 | 3 | 4 | 5 | 6 | 7 | 8 | 9 Predictable    | NA |
| 3.4.2 Going back to the previous screen is                                                                                  | Impossible 1          | 2 | 3 | 4 | 5 | 6 | 7 | 8 | 9 Easy           | NA |
| 3.4.3 Progression of tasks is                                                                                               | Confusing 1           | 2 | 3 | 4 | 5 | 6 | 7 | 8 | 9 Clearly marked | NA |
| Please write your comments about the screens here                                                                           |                       |   |   |   |   |   |   |   |                  |    |
|                                                                                                                             |                       |   |   |   |   |   |   |   |                  |    |
| <b>4. Terminology and System Information</b>                                                                                |                       |   |   |   |   |   |   |   |                  |    |
| 4.1 The use of terminology throughout system is                                                                             | Inconsistent 1        | 2 | 3 | 4 | 5 | 6 | 7 | 8 | 9 Consistent     | NA |
| 4.2 The terminology relates well to the activity I am doing                                                                 | Never 1               | 2 | 3 | 4 | 5 | 6 | 7 | 8 | 9 Always         | NA |
| 4.2.1 Computer terminology is used                                                                                          | Too frequently 1      | 2 | 3 | 4 | 5 | 6 | 7 | 8 | 9 Appropriately  | NA |
| 4.2.2 Terminology on the screen is                                                                                          | Ambiguous 1           | 2 | 3 | 4 | 5 | 6 | 7 | 8 | 9 Precise        | NA |

|                                                                          |                |   |   |   |   |   |   |   |              |    |
|--------------------------------------------------------------------------|----------------|---|---|---|---|---|---|---|--------------|----|
| 4.3 Messages that appear on screen are                                   | Inconsistent 1 | 2 | 3 | 4 | 5 | 6 | 7 | 8 | 9 Consistent | NA |
| 4.3.1 The position of instructions on the screen is                      | Inconsistent 1 | 2 | 3 | 4 | 5 | 6 | 7 | 8 | 9 Consistent | NA |
| 4.4 Messages that appear on screen are                                   | Confusing 1    | 2 | 3 | 4 | 5 | 6 | 7 | 8 | 9 Clear      | NA |
| 4.4.1 Instructions for commands or functions are                         | Confusing 1    | 2 | 3 | 4 | 5 | 6 | 7 | 8 | 9 Clear      | NA |
| 4.4.2 Instructions for correcting errors are                             | Confusing 1    | 2 | 3 | 4 | 5 | 6 | 7 | 8 | 9 Clear      | NA |
| 4.5 The computer keeps me informed about what it is doing                | Never 1        | 2 | 3 | 4 | 5 | 6 | 7 | 8 | 9 Always     | NA |
| 4.5.1 Animated cursors (different mouse pointer shapes) keep me informed | Never 1        | 2 | 3 | 4 | 5 | 6 | 7 | 8 | 9 Always     | NA |
| 4.5.2 Performing an operation leads to a predictable result              | Never 1        | 2 | 3 | 4 | 5 | 6 | 7 | 8 | 9 Always     | NA |
| 4.5.3 Controlling the amount of feedback is                              | Impossible 1   | 2 | 3 | 4 | 5 | 6 | 7 | 8 | 9 Easy       | NA |
| 4.5.4 The length of delay between operations is                          | Unacceptable 1 | 2 | 3 | 4 | 5 | 6 | 7 | 8 | 9 Acceptable | NA |
| 4.6 Error messages are                                                   | Unhelpful 1    | 2 | 3 | 4 | 5 | 6 | 7 | 8 | 9 Helpful    | NA |
| 4.6.1 Error messages clarify the problem                                 | Never 1        | 2 | 3 | 4 | 5 | 6 | 7 | 8 | 9 Always     | NA |
| 4.6.2 Phrasing of error messages is                                      | Unpleasant 1   | 2 | 3 | 4 | 5 | 6 | 7 | 8 | 9 Pleasant   | NA |

Please write your comments about terminology and system information here

## 5. Learning

|                                                   |                |   |   |   |   |   |   |   |               |    |
|---------------------------------------------------|----------------|---|---|---|---|---|---|---|---------------|----|
| 5.1 Learning to operate the system is             | Difficult 1    | 2 | 3 | 4 | 5 | 6 | 7 | 8 | 9 Easy        | NA |
| 5.1.1 Getting started is                          | Difficult 1    | 2 | 3 | 4 | 5 | 6 | 7 | 8 | 9 Easy        | NA |
| 5.1.2 Time to learn to use the system is          | Slow 1         | 2 | 3 | 4 | 5 | 6 | 7 | 8 | 9 Fast        | NA |
| 5.2 Exploration of features by trial and error is | Discouraging 1 | 2 | 3 | 4 | 5 | 6 | 7 | 8 | 9 Encouraging | NA |

|                                                           |              |   |   |   |   |   |   |   |              |    |
|-----------------------------------------------------------|--------------|---|---|---|---|---|---|---|--------------|----|
| 5.3 Remembering menu options and steps in the workflow is | Difficult 1  | 2 | 3 | 4 | 5 | 6 | 7 | 8 | 9 Easy       | NA |
| 5.4 The number of steps per task is                       | Too many 1   | 2 | 3 | 4 | 5 | 6 | 7 | 8 | 9 Just right | NA |
| 5.5 Feedback on the completion of sequence of steps is    | Unclear 1    | 2 | 3 | 4 | 5 | 6 | 7 | 8 | 9 Clear      | NA |
| Please write your comments about learning here            |              |   |   |   |   |   |   |   |              |    |
|                                                           |              |   |   |   |   |   |   |   |              |    |
| <b>6. Multimedia</b>                                      |              |   |   |   |   |   |   |   |              |    |
| 6.1 Quality of still pictures/photographs is              | Bad 1        | 2 | 3 | 4 | 5 | 6 | 7 | 8 | 9 Good       | NA |
| 6.1.1 Pictures/Photos are                                 | Fuzzy 1      | 2 | 3 | 4 | 5 | 6 | 7 | 8 | 9 Clear      | NA |
| 6.1.2 Picture/Photo brightness is                         | Dim 1        | 2 | 3 | 4 | 5 | 6 | 7 | 8 | 9 Bright     | NA |
| 6.2 Colours used are                                      | Unnatural 1  | 2 | 3 | 4 | 5 | 6 | 7 | 8 | 9 Natural    | NA |
| 6.1.2 Amount of colours available is                      | Inadequate 1 | 2 | 3 | 4 | 5 | 6 | 7 | 8 | 9 Adequate   | NA |
| Please write your comments about multimedia here          |              |   |   |   |   |   |   |   |              |    |
|                                                           |              |   |   |   |   |   |   |   |              |    |
| <b>7. Training Material</b>                               |              |   |   |   |   |   |   |   |              |    |
| 7.1 The training workshop or training video was           | Useless 1    | 2 | 3 | 4 | 5 | 6 | 7 | 8 | 9 Helpful    | NA |
| 7.2 The terminology used in the manual is                 | Confusing 1  | 2 | 3 | 4 | 5 | 6 | 7 | 8 | 9 Clear      | NA |
| 7.3 The information from the manual is easily understood  | Never 1      | 2 | 3 | 4 | 5 | 6 | 7 | 8 | 9 Always     | NA |
| 7.4 Finding a solution to a problem using the manual is   | Impossible 1 | 2 | 3 | 4 | 5 | 6 | 7 | 8 | 9 Easy       | NA |
| 7.5 Amount of help given is                               | Inadequate 1 | 2 | 3 | 4 | 5 | 6 | 7 | 8 | 9 Adequate   | NA |
| 7.6 Placement of help messages on the screen is           | Confusing 1  | 2 | 3 | 4 | 5 | 6 | 7 | 8 | 9 Clear      | NA |
| 7.7 Accessing help messages is                            | Difficult 1  | 2 | 3 | 4 | 5 | 6 | 7 | 8 | 9 Easy       | NA |
| Please write your comments about training material here   |              |   |   |   |   |   |   |   |              |    |

|                                                                                                                                                                                                              |                   |   |   |   |   |   |   |   |               |    |
|--------------------------------------------------------------------------------------------------------------------------------------------------------------------------------------------------------------|-------------------|---|---|---|---|---|---|---|---------------|----|
|                                                                                                                                                                                                              |                   |   |   |   |   |   |   |   |               |    |
|                                                                                                                                                                                                              |                   |   |   |   |   |   |   |   |               |    |
| <b>8. System Capabilities</b>                                                                                                                                                                                |                   |   |   |   |   |   |   |   |               |    |
| 8.1 System speed is                                                                                                                                                                                          | Too slow 1        | 2 | 3 | 4 | 5 | 6 | 7 | 8 | 9 Fast enough | NA |
| 8.1.1 Response time for most operations is                                                                                                                                                                   | Too slow 1        | 2 | 3 | 4 | 5 | 6 | 7 | 8 | 9 Fast enough | NA |
| 8.2 The system is reliable                                                                                                                                                                                   | Never 1           | 2 | 3 | 4 | 5 | 6 | 7 | 8 | 9 Always      | NA |
| 8.2.1 System failures occur                                                                                                                                                                                  | Frequently 1      | 2 | 3 | 4 | 5 | 6 | 7 | 8 | 9 Seldom      | NA |
| 8.2.2 The system warns you about potential problems                                                                                                                                                          | 1 Never           | 2 | 3 | 4 | 5 | 6 | 7 | 8 | 9 Always      | NA |
| 8.3 Correcting your mistakes is                                                                                                                                                                              | Difficult 1       | 2 | 3 | 4 | 5 | 6 | 7 | 8 | 9 Easy        | NA |
| 8.3.1 Correcting typos is                                                                                                                                                                                    | Complex 1         | 2 | 3 | 4 | 5 | 6 | 7 | 8 | 9 Simple      | NA |
| 8.3.2 Ability to undo operations is                                                                                                                                                                          | Inadequate 1      | 2 | 3 | 4 | 5 | 6 | 7 | 8 | 9 Adequate    | NA |
| 8.4 The ease of operation depends on my level of experience                                                                                                                                                  | Never 1           | 2 | 3 | 4 | 5 | 6 | 7 | 8 | 9 Always      | NA |
| 8.4.1 I can accomplish tasks knowing only a few commands                                                                                                                                                     | With difficulty 1 | 2 | 3 | 4 | 5 | 6 | 7 | 8 | 9 Easily      | NA |
| Please write your comments about system capabilities here                                                                                                                                                    |                   |   |   |   |   |   |   |   |               |    |
|                                                                                                                                                                                                              |                   |   |   |   |   |   |   |   |               |    |
| <b>9. Your opinion matters. Please leave either a general or a specific comment below if you would like to. If you are concerned about certain sections, just mention their number as a reference point.</b> |                   |   |   |   |   |   |   |   |               |    |
|                                                                                                                                                                                                              |                   |   |   |   |   |   |   |   |               |    |

Thank you!
