# Supplementary material for: Design, Implementation and Usability analysis of Patient Empowerment in ADLIFE project via Patient Reported Outcome Measures and Shared Decision Making
Source: Research Square preprint supplement (doi:10.21203/rs.3.rs-3125971/v1), 2023-07-10

## Additional File 6

- File format: pdf
- Title: The Self-Assessment Questionnaire
- Description of Data: The Self-Assessment Questionnaire Flow

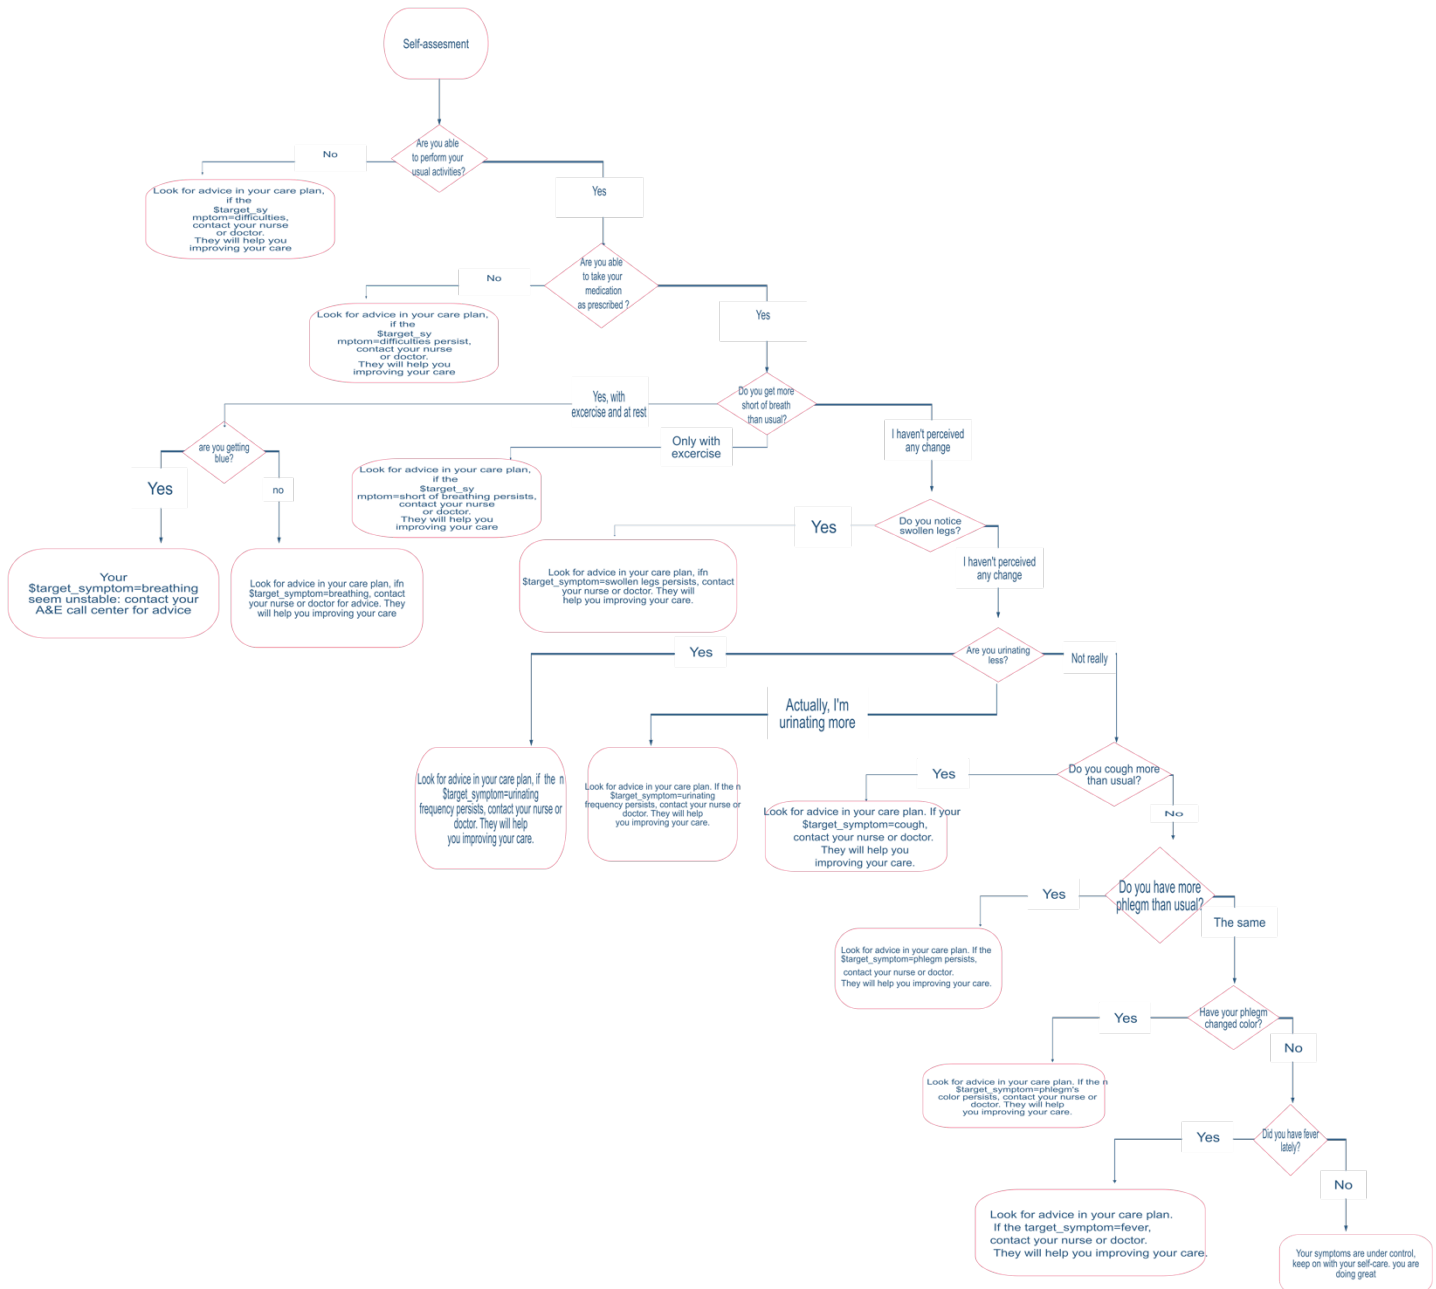

Supplement: Supplementary file [file ef6dd8e15c61319eaec2b612.pdf]
